# Supplementary material for: Systemic risk of cruise ship incidents from an Arctic and insurance perspective
Source: Oxford University Press journal article supplement (doi:10.1525/elementa.2020.00009), 2021-01-01
Supplement: analytical_framework_appendix_a.xlsx [file analytical_framework_appendix_a.xlsx]

## Sheet: Analytical framework
	Arctic and Antarctic cases	Maxim Gorky	MS Explorer	M/V Clipper Adventurer	M/V Akademik Ioffe	Viking Sky	Non-Arctic cases	MS Herald of Free Enterprise	Estonia	Al-Salam Boccaccio 98	Costa Concordia	Rabaul Queen	Oriental star
		1989	2007	2010	2018	2019		1987	1994	2006	2012	2012	2015
Economic
Insurance (ship, e.g. total loss)
Liability claims from passengers or their relatives
Environmental liability claims
Recovery of the wreck
Cost to society, e.g. cost to coast guard
Social
Loss of lives
Injuries
Panic, people jumping into the water
Multi-nationality of crew and passengers cause problems
Mass rescuse
Security
Evacuation, search and rescue operation
Missing people
People trapped inside a ship
Mass rescuse
Environmental
Environmental damage
Wreck removal
Recycling of the wreck
Impacts on fish (e.g. ingestion of microplastics)
Business related impacts
Insurance price increase
Policy
Tighten regulation
Antarctic Treaty
Polar Code
Legal regime
Operation
Lack of training
Chaos and confusion, lack of communication
Practical instruction (drill) on the safety insufficient
Flaw in signaling (alarm) for the abandon ship
Total loss of the vessel
Personal consequenstes, conviction of manslaughter
Impacts on booking, revenues and/or profits
